# Supplementary material for: A new approach for the formation of alloy nanoparticles: laser synthesis of gold–silver alloy from gold–silver colloidal mixtures
Source: Royal Society of Chemistry journal article supplement (doi:10.1039/b009854j), 2001-01-01
Supplement: b009854j.doc [file b009854j.doc]

**Chemical Communications**

**A New Approach for the Formation of the Alloy Nanoparticles: Laser Synthesis of Gold-Silver Alloy from Gold-Silver Colloidal Mixtures**

**(Electronic Supplementary Information)**

**Yu-Hung Chen and Chen-Sheng Yeh***

*Department of Chemistry, National Cheng Kung University*

*Tainan, Taiwan 701, R.O.C*

*Author to whom correspondence should be addressed. E-mail address: csyeh@mail.ncku.edu.tw Fax:+886-6-2740552

**
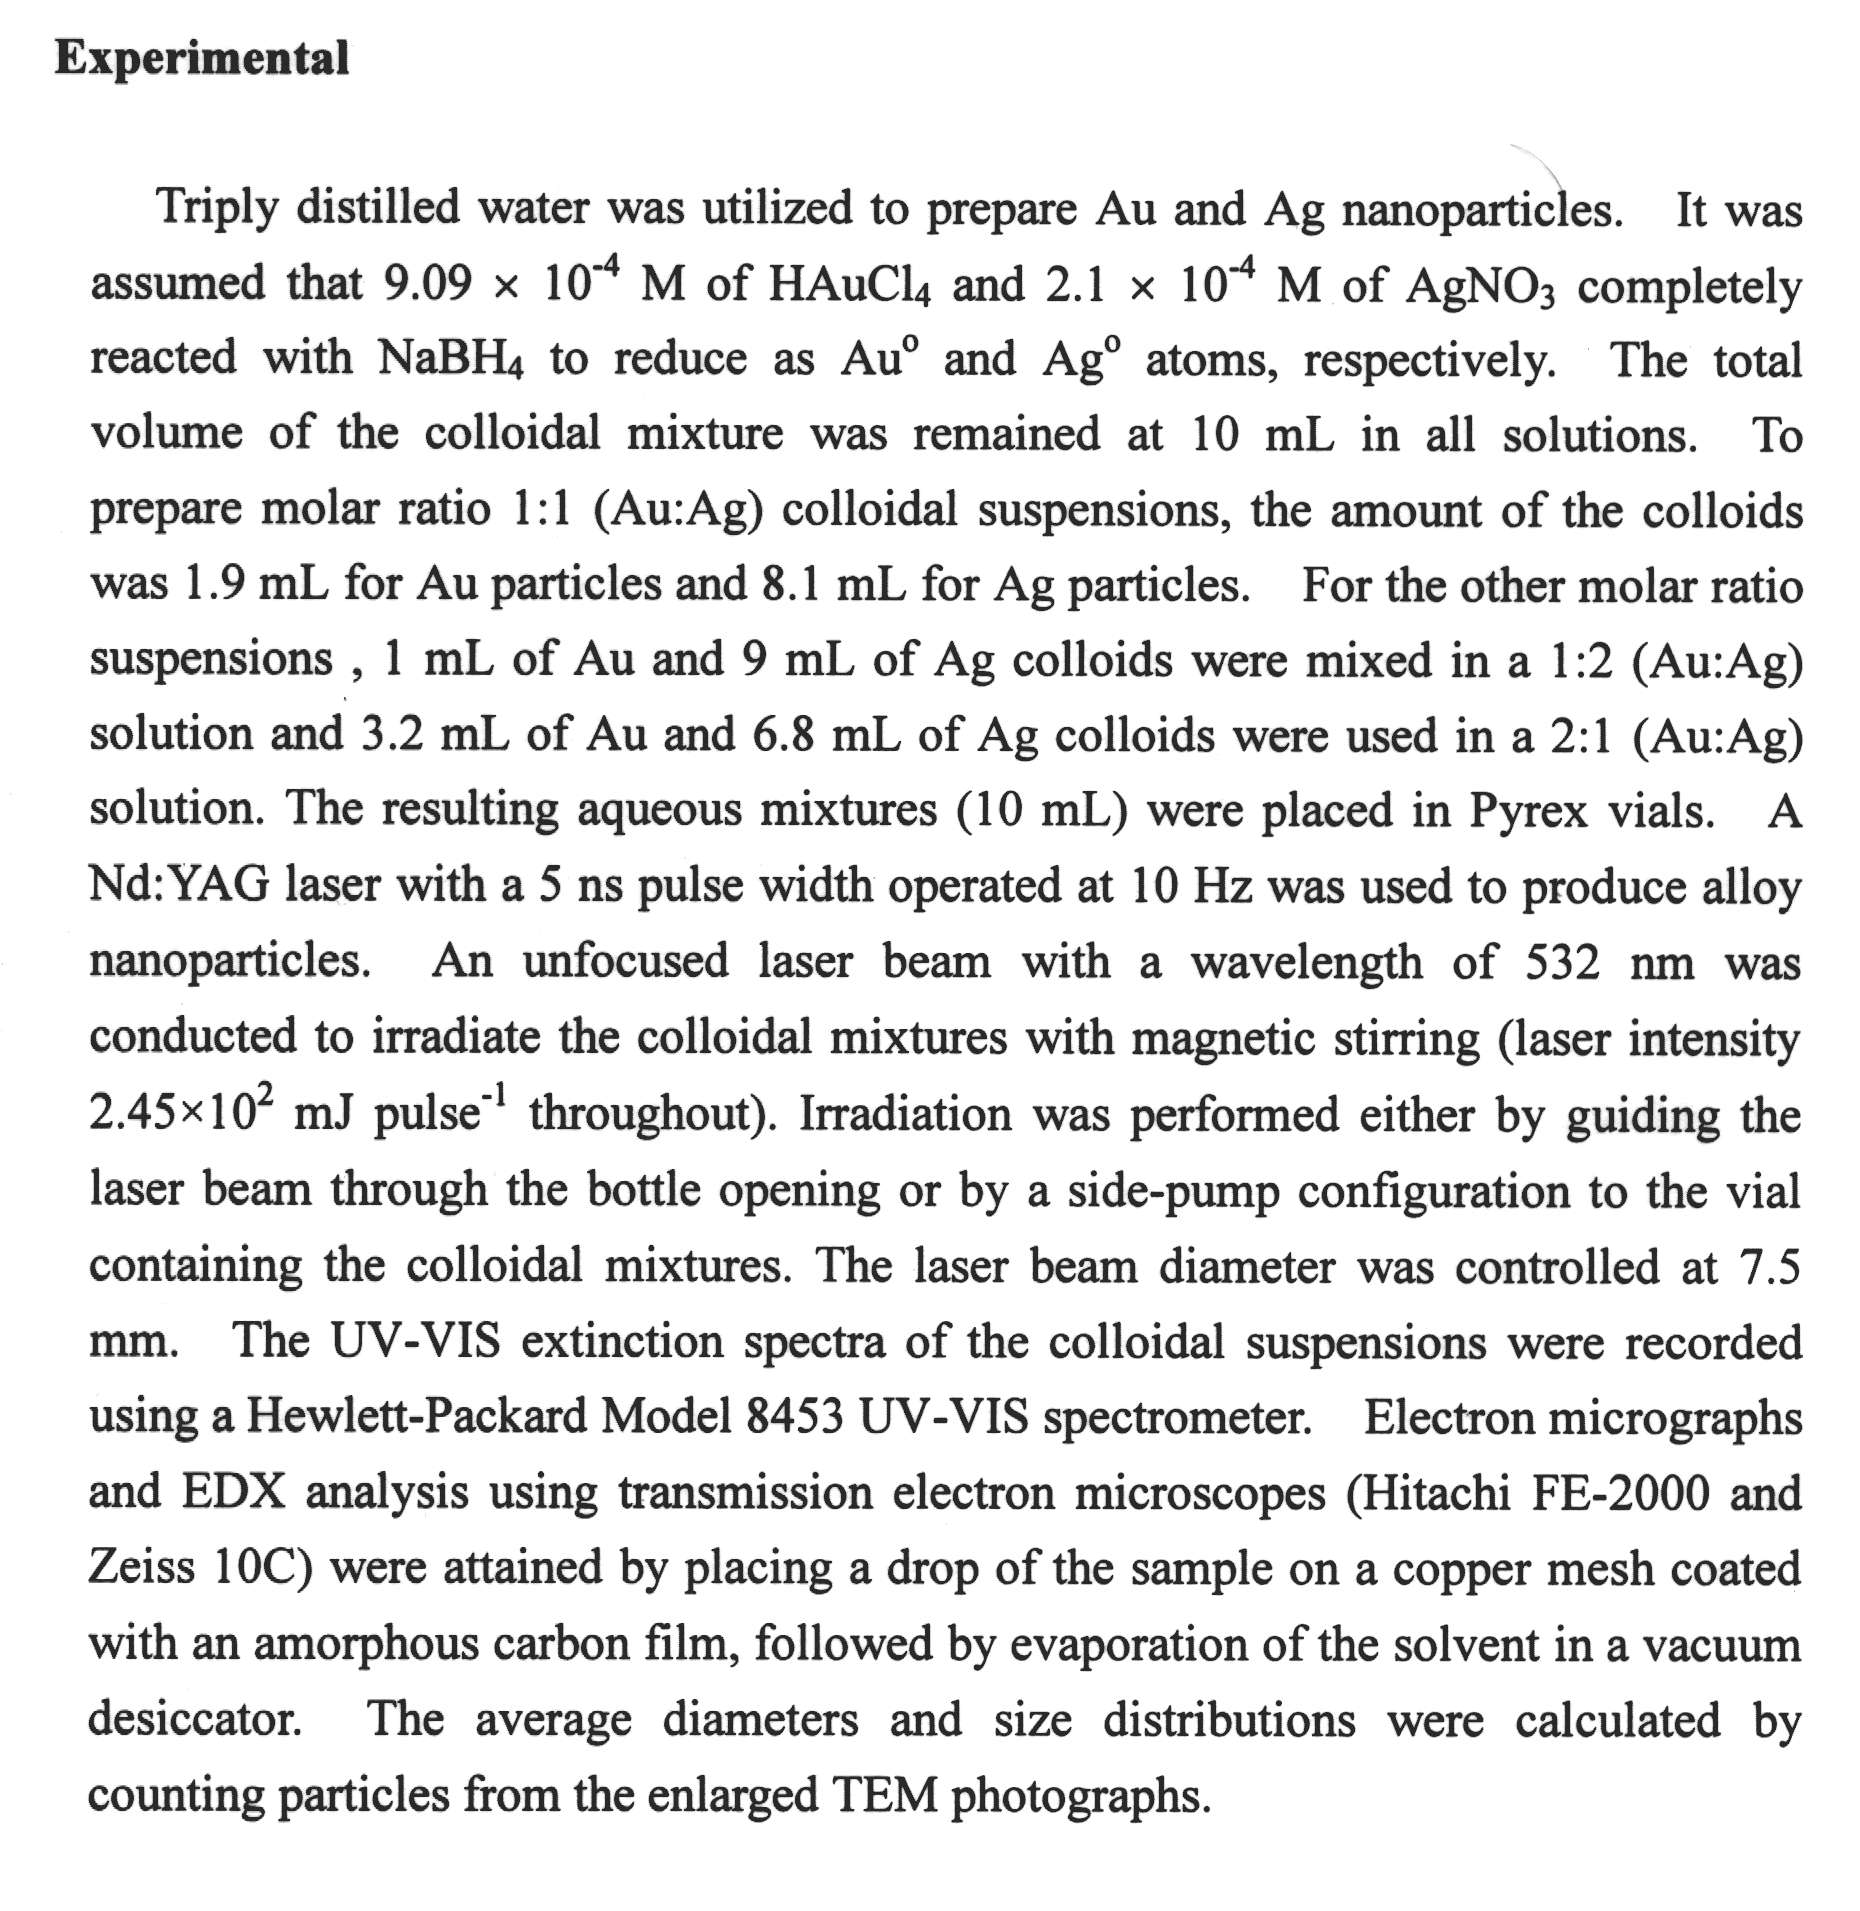
**

**
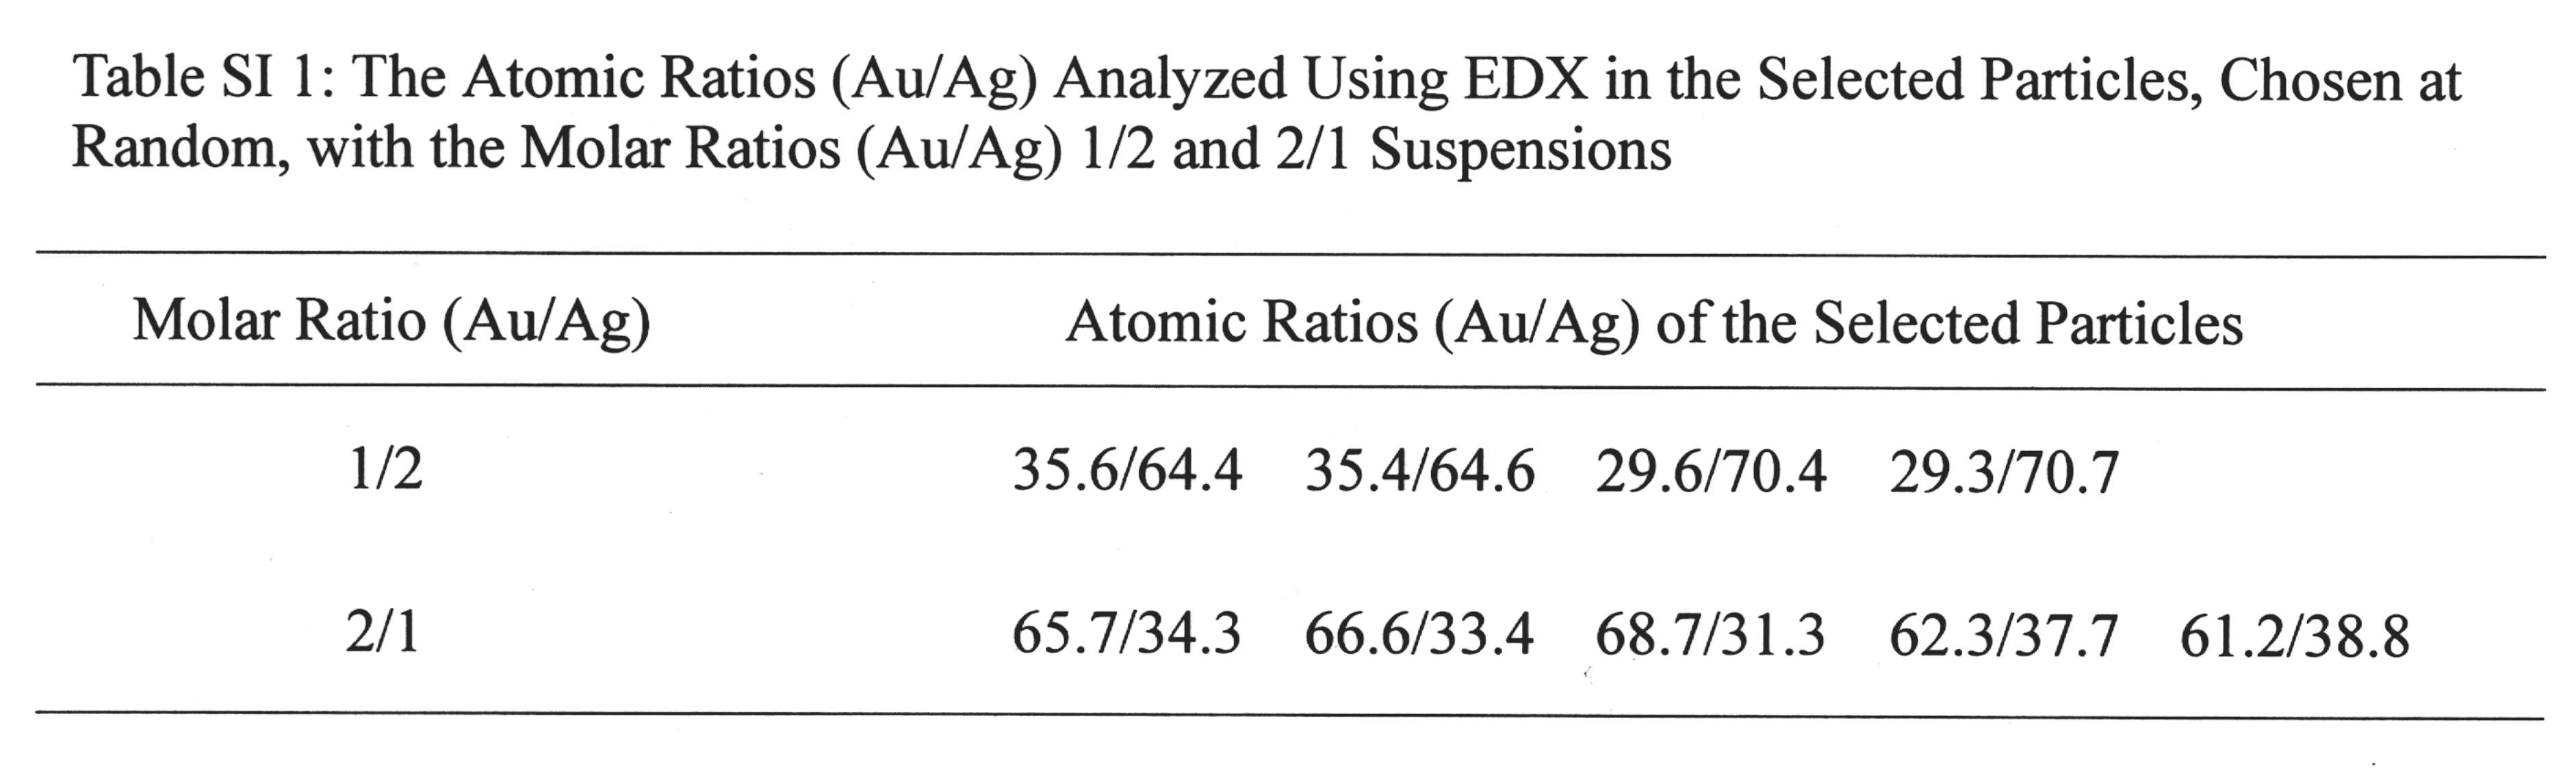
**


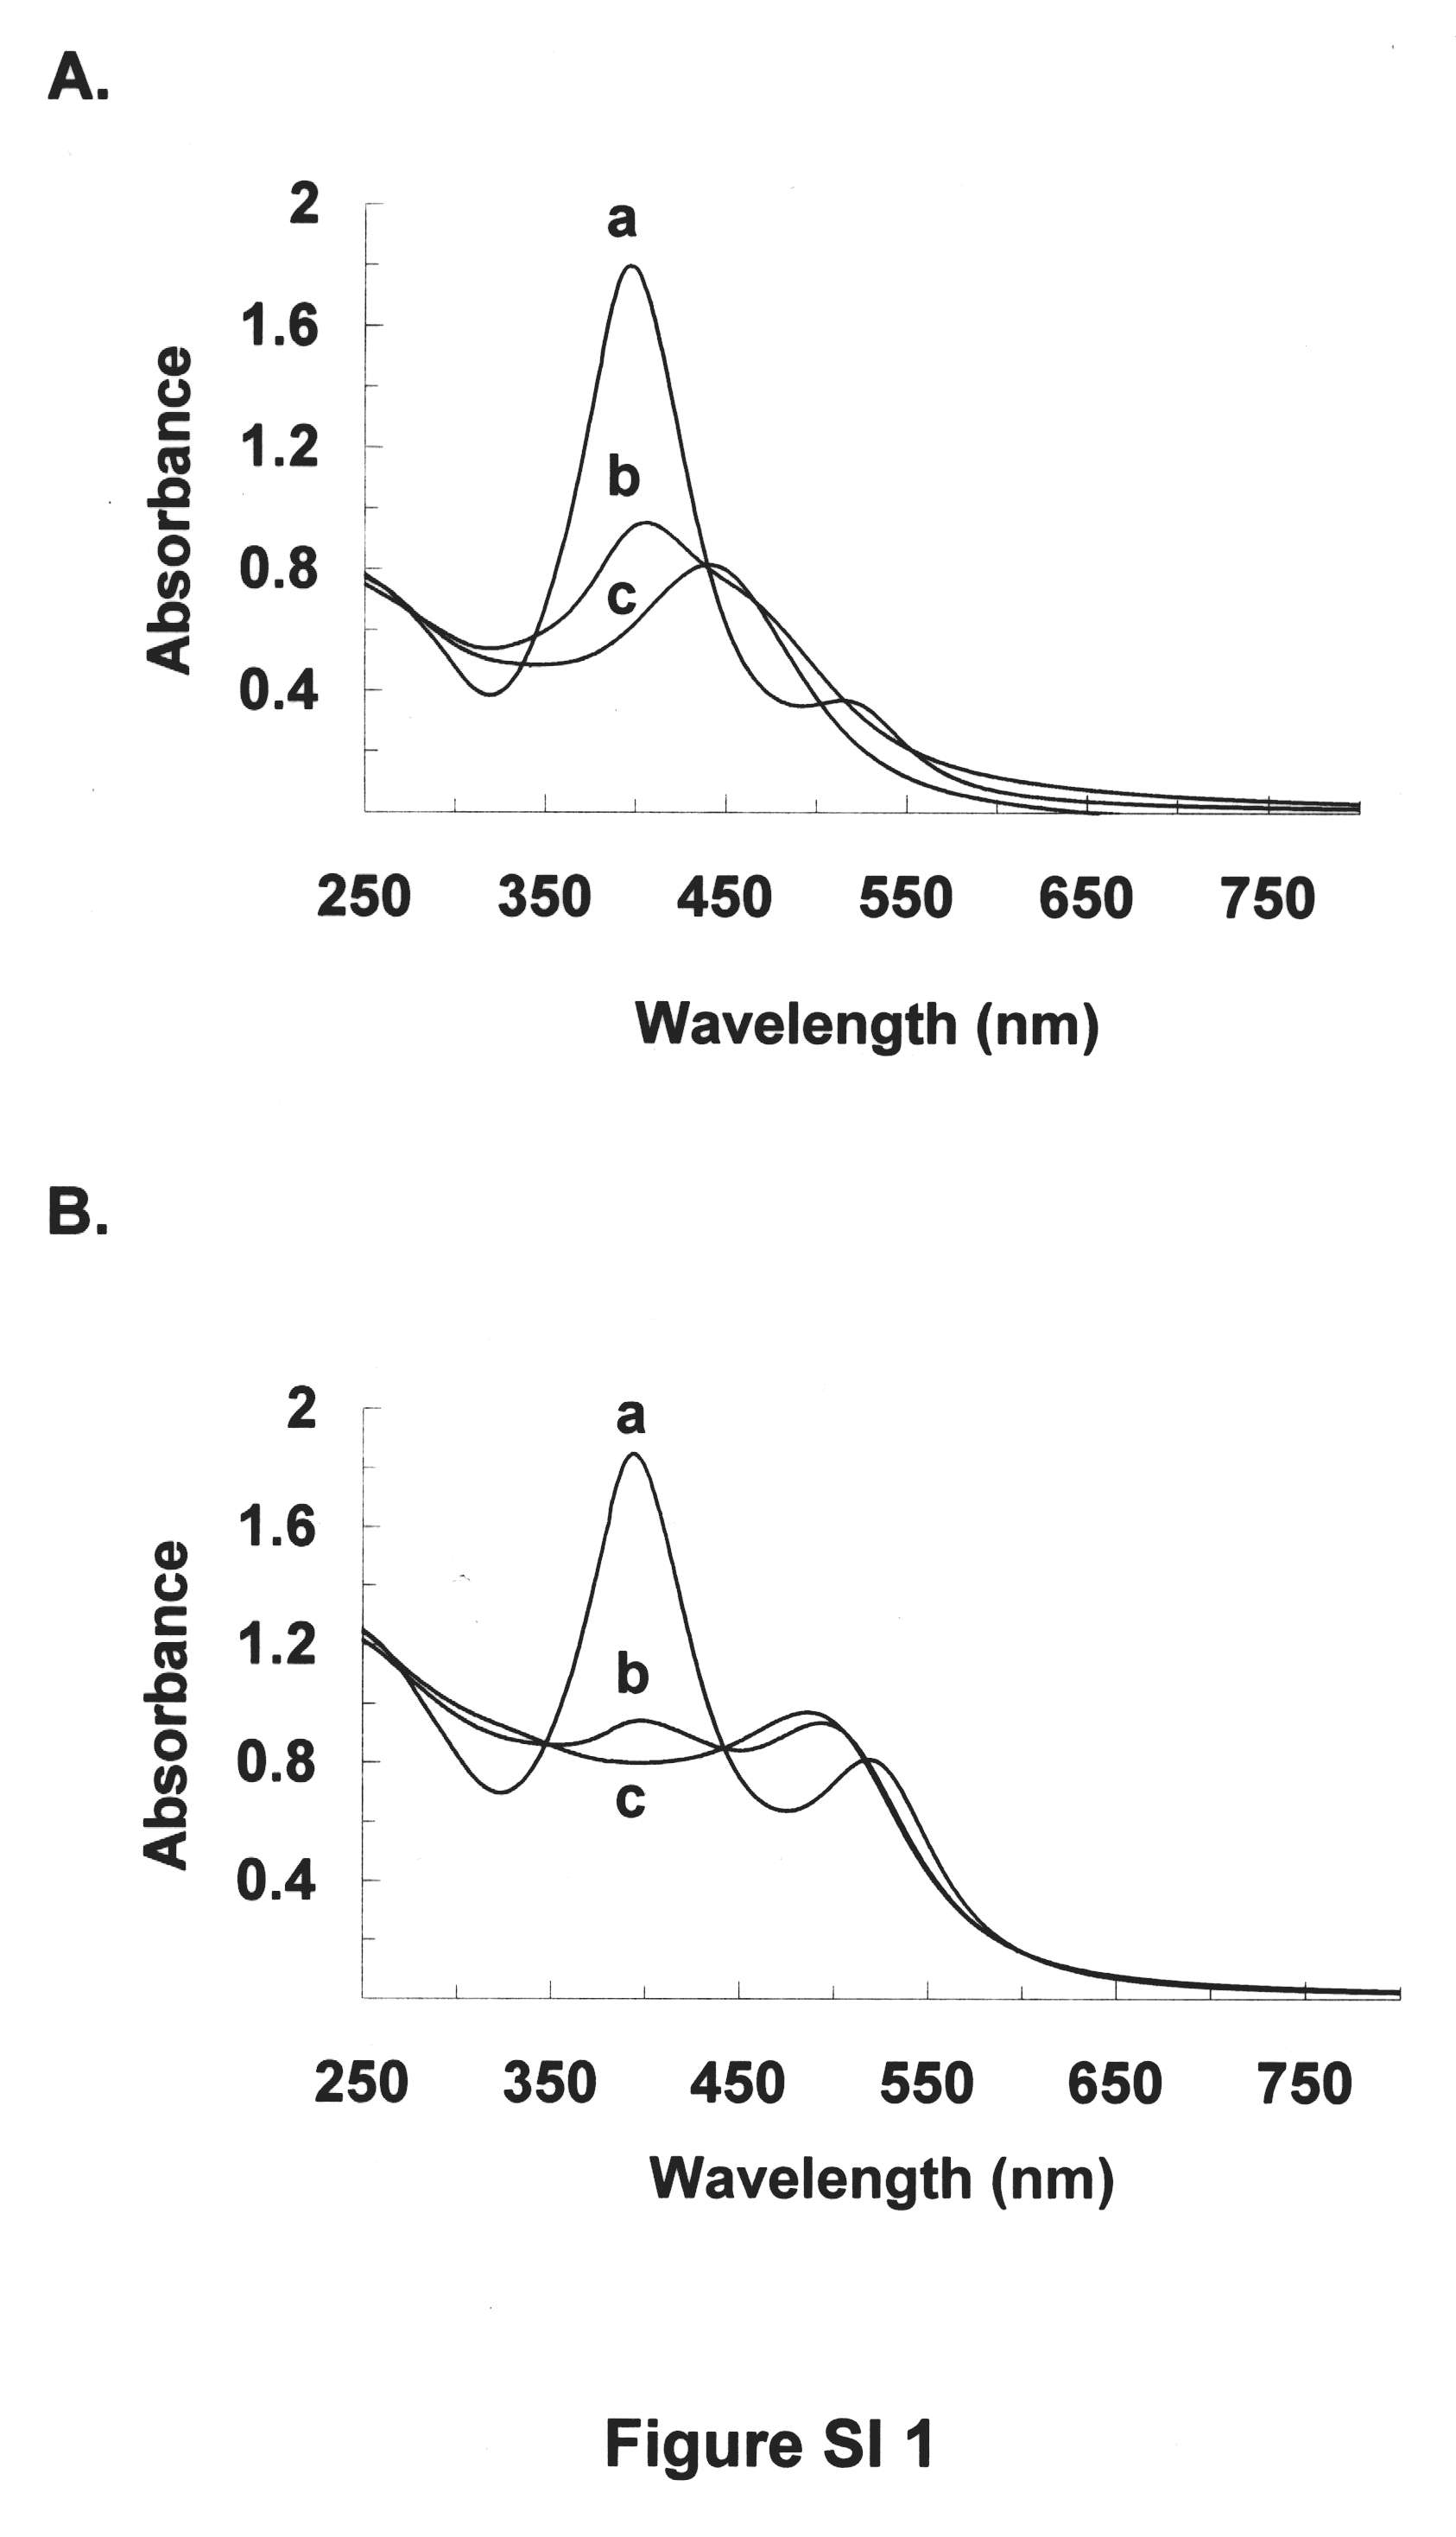


Figure SI 1: The Changes of the UV-vis absorption spectra as a function of the laser irradiation time with (A) 0 min (a), 5 min (b), and 25 min (c) in a molar ratio (Au/Ag) 1/2 suspension and (B) 0 min (a), 9 min (b), and 20 min (c) in a molar ratio (Au/Ag) 2/1 suspension. A 532 nm wavelength with laser intensity of 2.45  102 mJ/pulse was used to generate alloy nanoparticles.


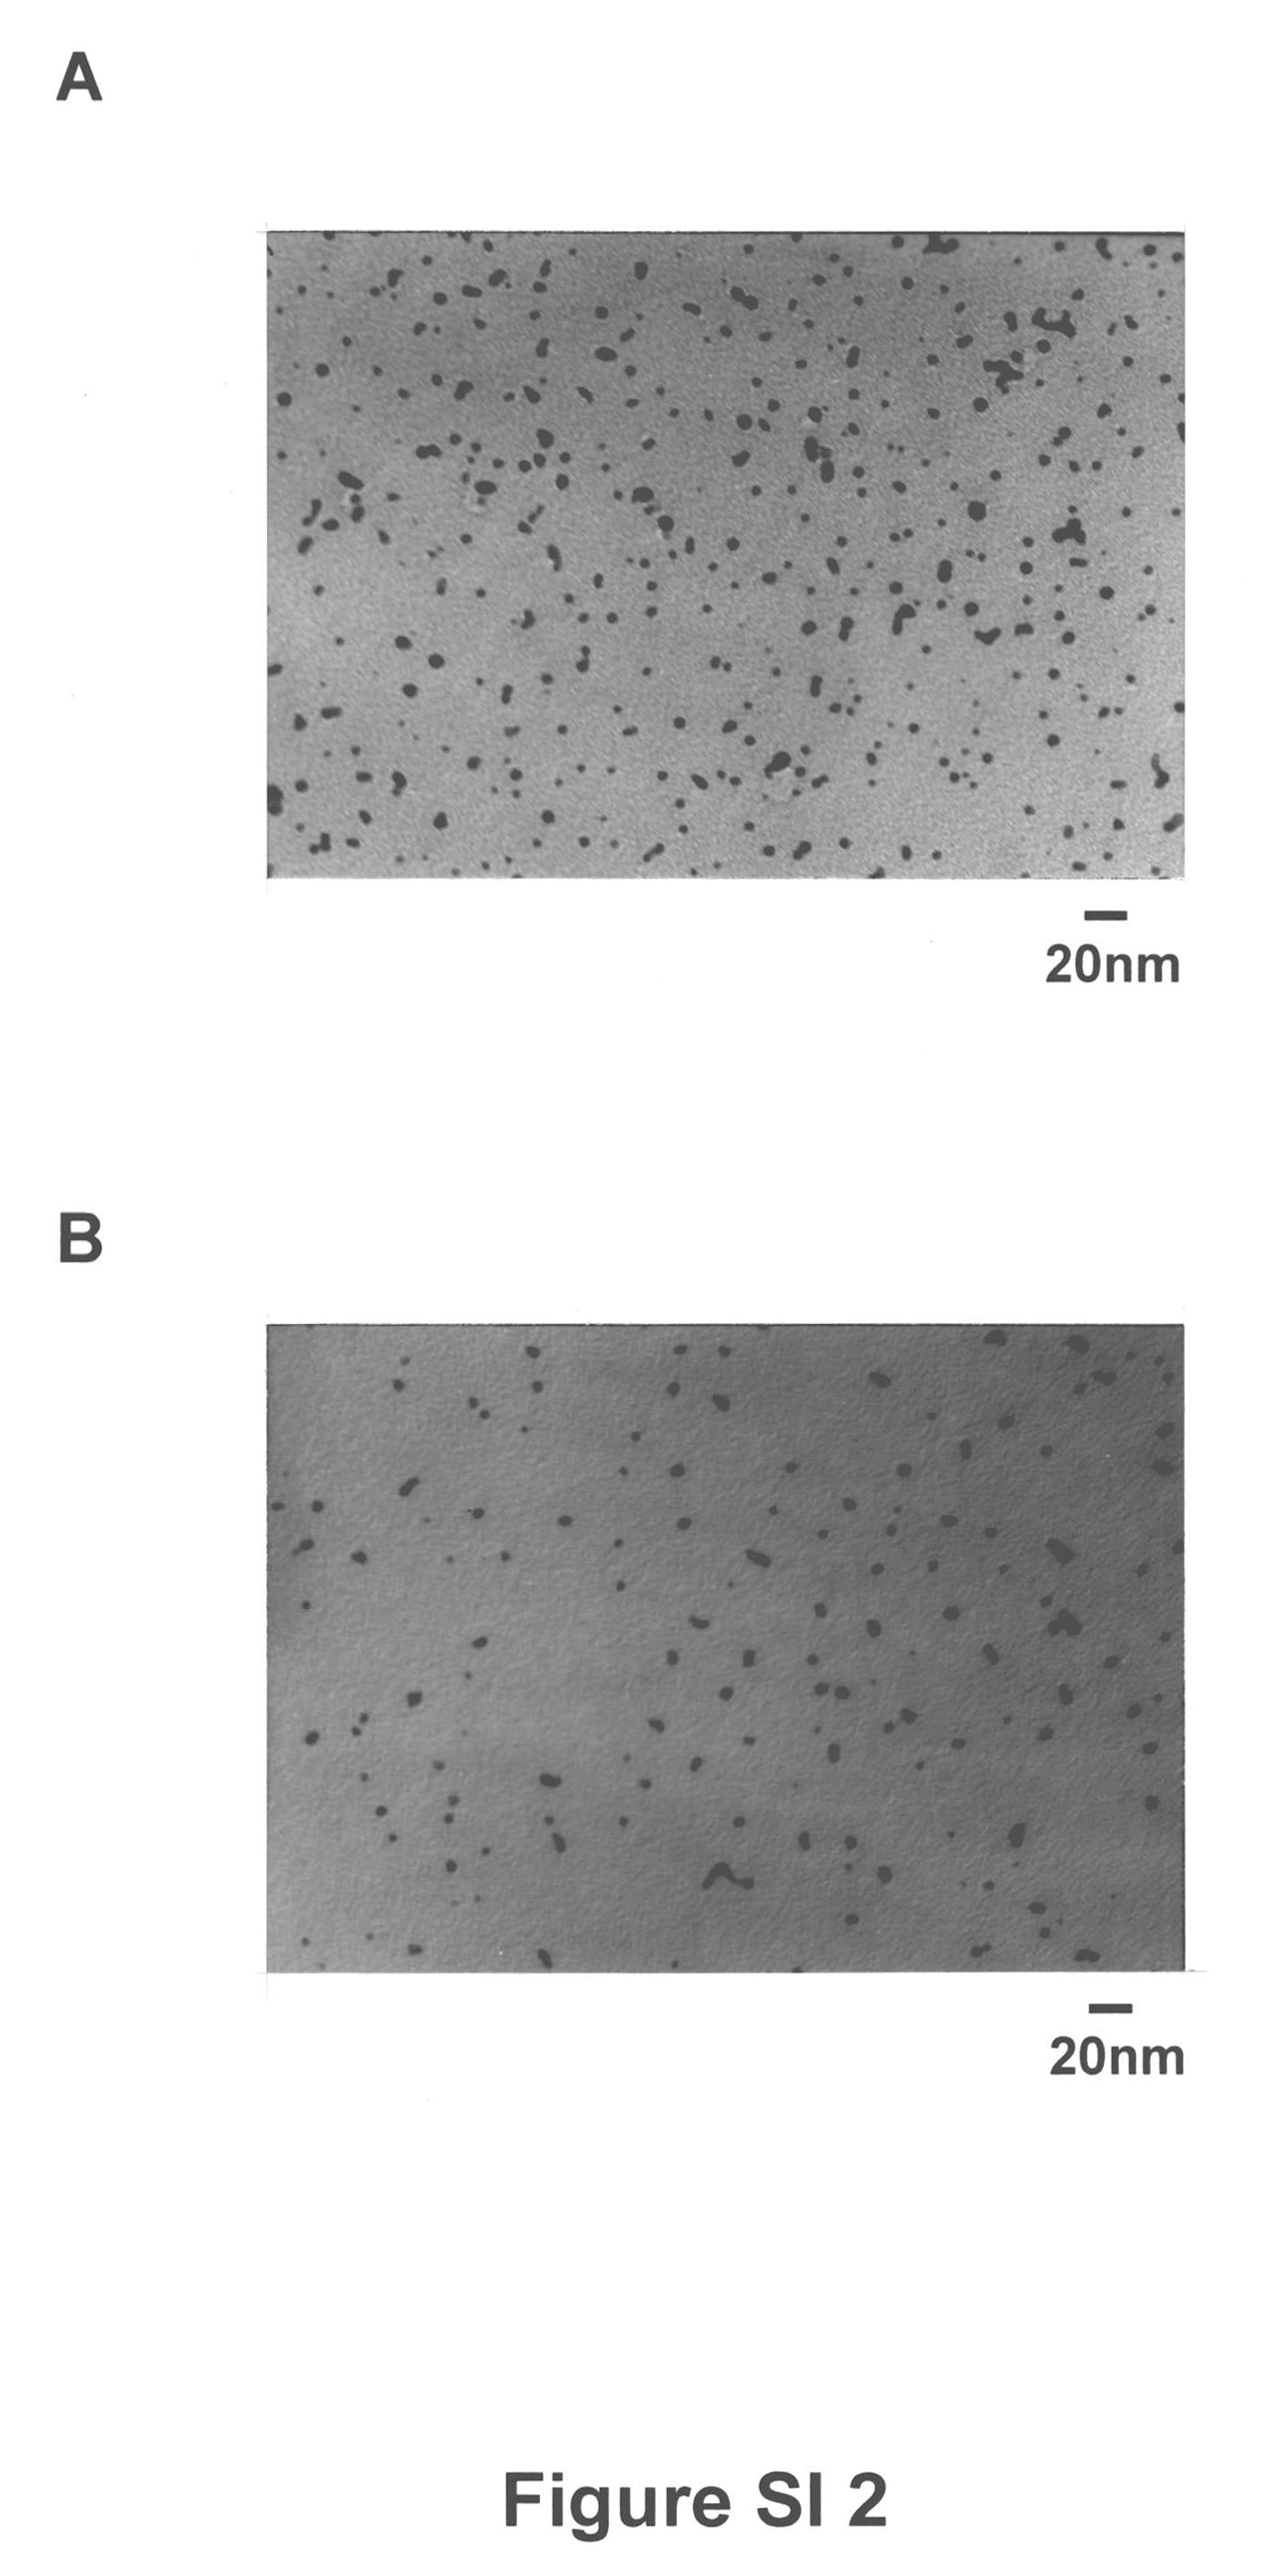


Figure SI 2: TEM images corresponding to the gold-silver alloy nanoparticles of (A) a molar ratio (Au/Ag) 1/2 suspension after exposure to the laser light for 30 min, and (B) a molar ratio (Au/Ag) 2/1 suspension after exposure to the laser light for 20 min.
